# Supplementary material
Source: PubMed Central journal article supplement (PMC7246302)

**Supplementary material**

Predictive symptoms and comorbidities for severe COVID-19 and intensive care unit admission: a systematic review and meta-analysis (*International Journal of Public Health*)

**Fig. S1** Critical appraisal of included studies

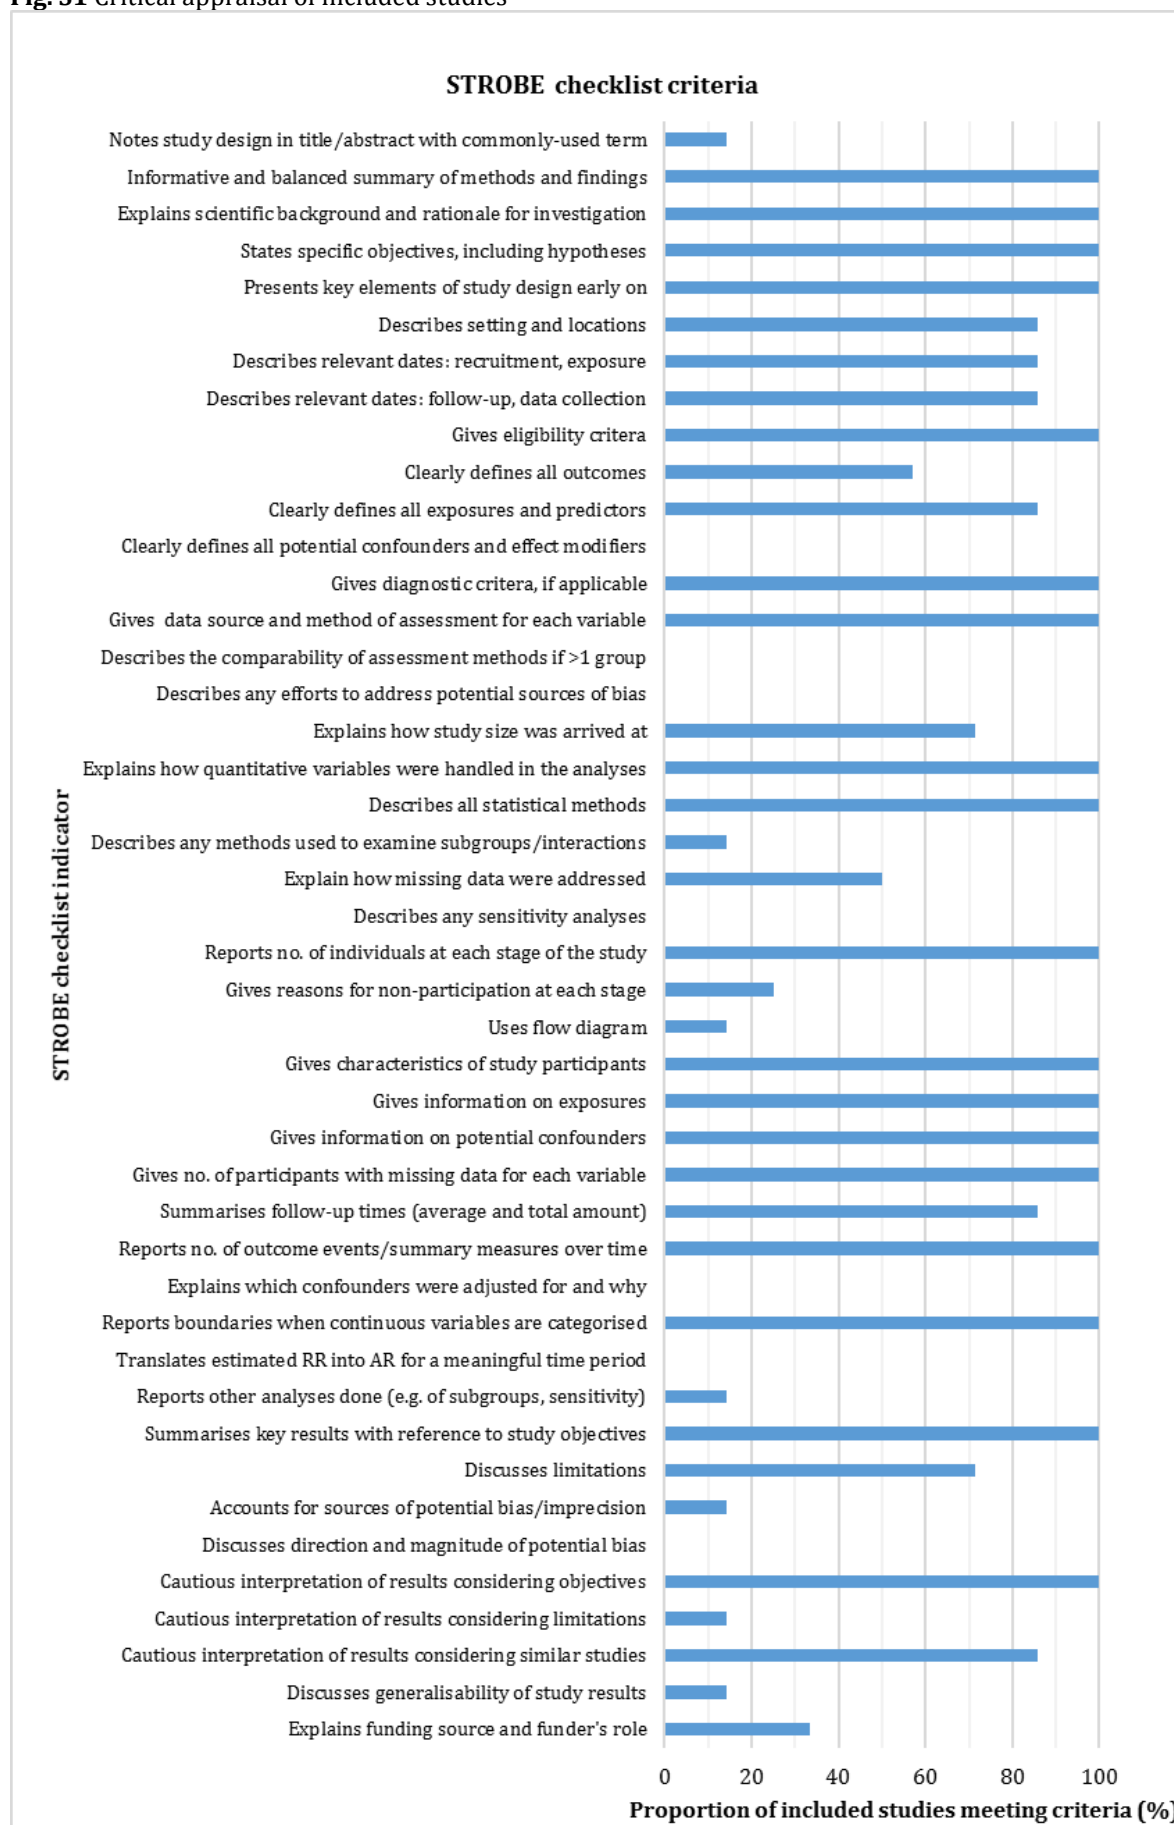

Supplement: 38_2020_1390_MOESM1_ESM.pdf [file 38_2020_1390_MOESM1_ESM.pdf]
